# Supplementary material
Source: PubMed Central journal article supplement (PMC4227821)
Supplement: ja503115n_si_001.pdf [file ja503115n_si_001.pdf]

**Supporting Information for:**

**Triphase Interface Synthesis of Plasmonic Gold  
Bellflowers as Near-infrared Light Mediated  
Acoustic/Thermal Theranostics**

Peng Huang,<sup>1§</sup> Pengfei Rong,<sup>1,2,4§</sup> Jing Lin,<sup>1</sup> Wanwan Li,<sup>1</sup> Xuefeng Yan,<sup>1</sup> Molly Gu Zhang,<sup>1</sup> Liming Nie,<sup>1,3</sup> Gang Niu,<sup>1</sup> Jie Lu,<sup>1</sup> Wei Wang,<sup>4</sup> Xiaoyuan Chen<sup>1\*</sup>

<sup>1</sup>Laboratory of Molecular Imaging and Nanomedicine (LOMIN), National Institute of Biomedical Imaging and Bioengineering (NIBIB), National Institutes of Health, Bethesda, Maryland 20892, United States

<sup>2</sup>State Key Laboratory for Powder Metallurgy, Central South University, Changsha, Hunan 410083, China

<sup>3</sup>Center for Molecular Imaging and Translational Medicine, State Key Laboratory of Molecular Vaccinology and Molecular Diagnostics, School of Public Health, Xiamen University, Xiamen 361005, China

<sup>4</sup>Department of Radiology, The Third Xiangya Hospital, Central South University, Changsha, Hunan 410013, PR China

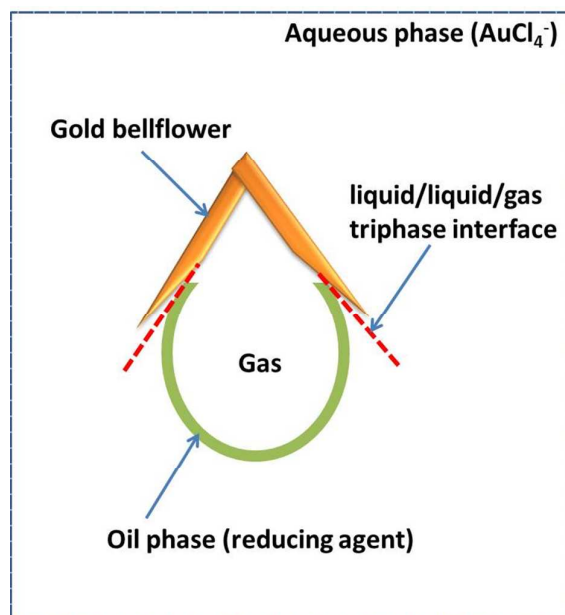

**Scheme S1** The growth mechanism of GBFs. Outward flange bubble as an example. reacted molecular precursors were spatially separated in the hexane/toluene (reducing agent) and aqueous phases ( $\text{AuCl}_4^-$ ). Upon ultrasound irradiation, due to the cavitation and nebulization between ultrasound and solvent media, the redox reaction was mostly occurred along the liquid/liquid/gas triphase interface with extremely high temperature and pressure.

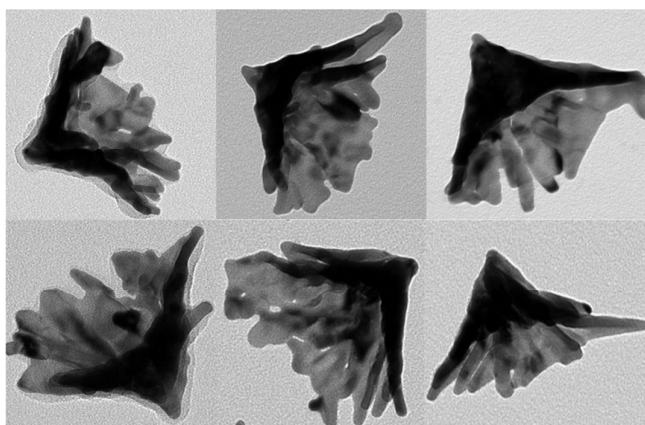

**Figure S1.** Side View TEM images of individual GBFs.

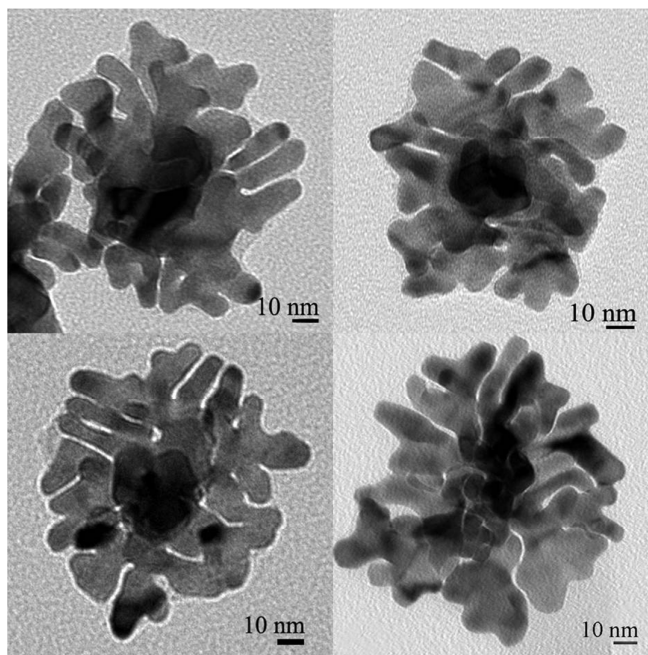

**Figure S2.** Top View TEM images of individual GBFs.

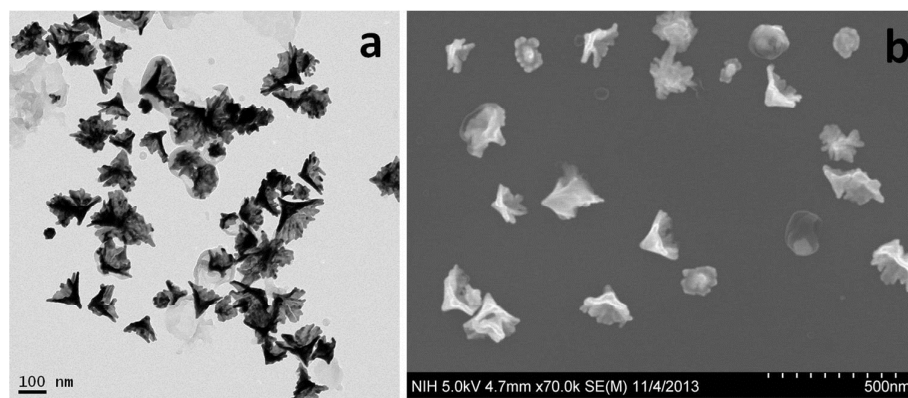

**Figure S3.** Low magnification TEM (a) and SEM (B) images of GBFs.

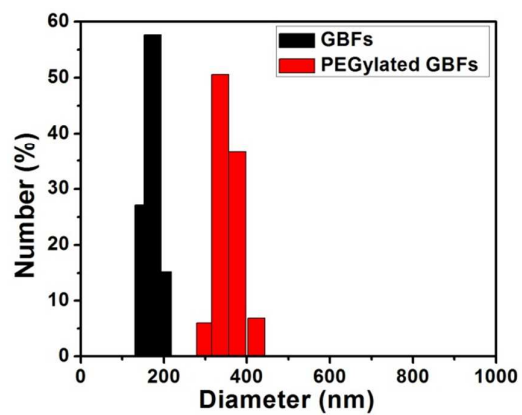

**Figure S4.** Size distributions of GBFs and PEGylated GBFs measured by dynamic light scattering (DLS).

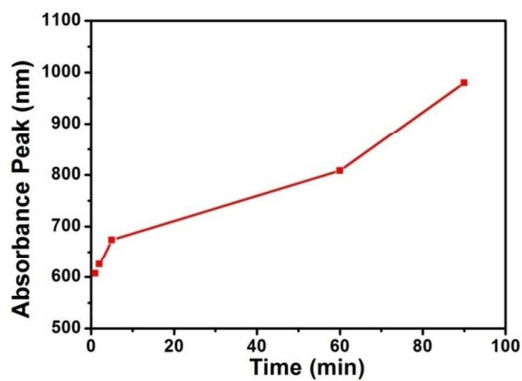

**Figure S5.** Time-dependent LSPR peak changes of GBFs.

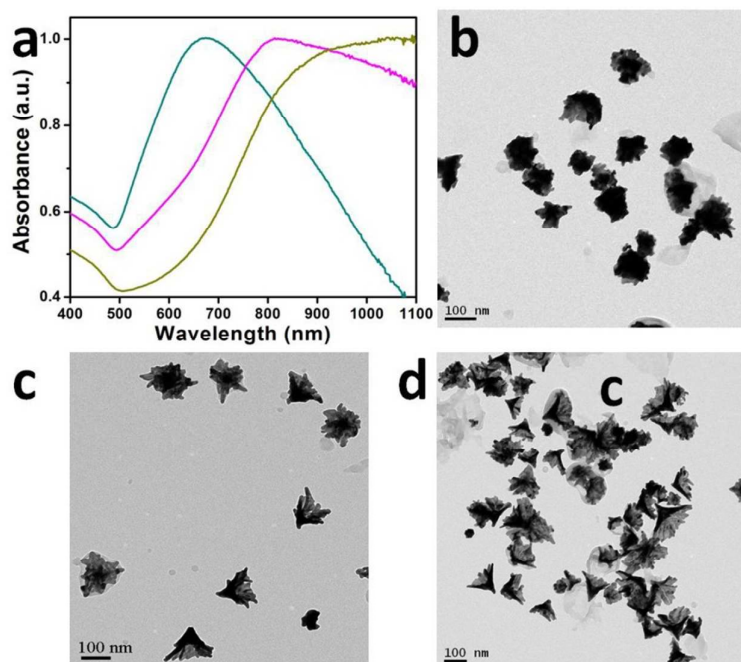

**Figure S6.** (a) UV-vis-NIR absorbance spectra of GBFs at 5, 60, and 90 min, and (b-d) the corresponding TEM images.

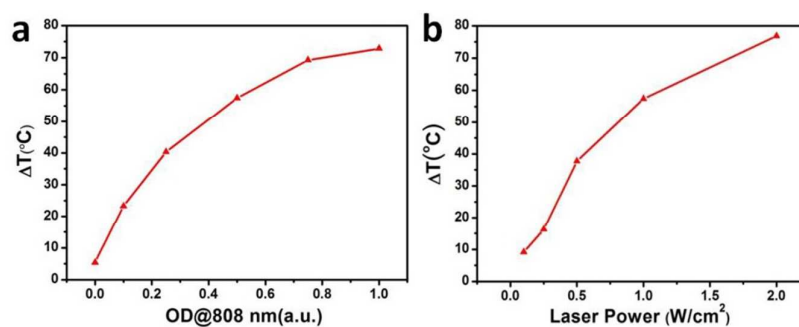

**Figure S7.** (a) Plot of temperature change ( $\Delta T$ ) of aqueous solution of GBFs with the same laser power density of  $1 \text{ W/cm}^2$  and different optical densities (ODs) at 808 nm; (b) Plot of temperature change ( $\Delta T$ ) of aqueous solution of GBFs with  $\text{OD}@808 \text{ nm}$  equals to 0.5 irradiated by different laser power densities.

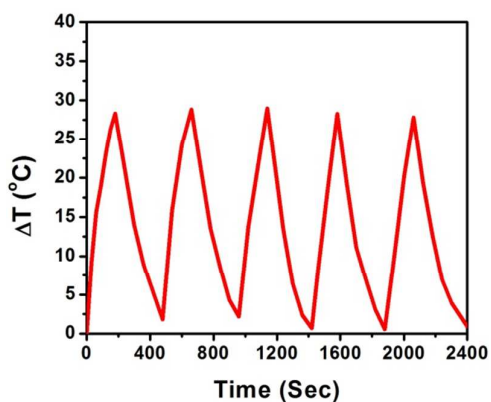

**Figure S8.** Plot of temperature change ( $\Delta T$ ) of GBFs solution ( $OD@808\text{ nm} = 0.5$ ) irradiated by an 808 nm laser ( $0.5\text{ W/cm}^2$ ) for five on/off cycles (on: 3 min, off: 5 min).

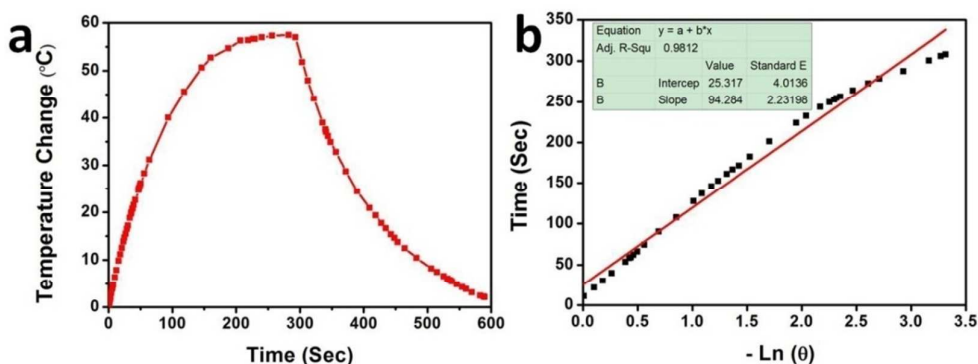

**Figure S9.** (a) Photothermal effect of the irradiation of the aqueous dispersion of BGVs ( $OD@808\text{ nm} = 0.5$ ) with the NIR laser (808 nm,  $1\text{ W/cm}^2$ ), in which the irradiation lasted for 5 min, and then the laser was turned off. (b) Time constant for heat transfer from the system is determined to be  $\tau = 94.28\text{ s}$  by applying the linear time data from the cooling period (after 300 s) versus negative natural logarithm of driving force temperature, which is obtained from the cooling stage of panel a.

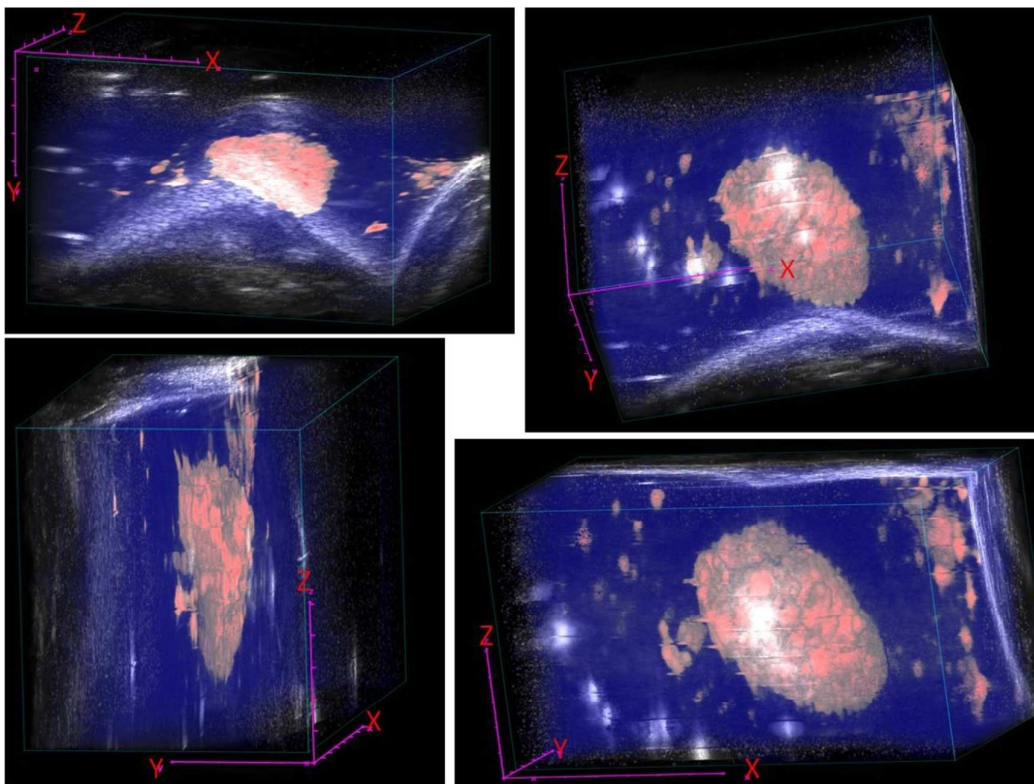

**Figure S10.** *In vivo* photoacoustic (PA) images of tumor tissue after intratumoral injection.

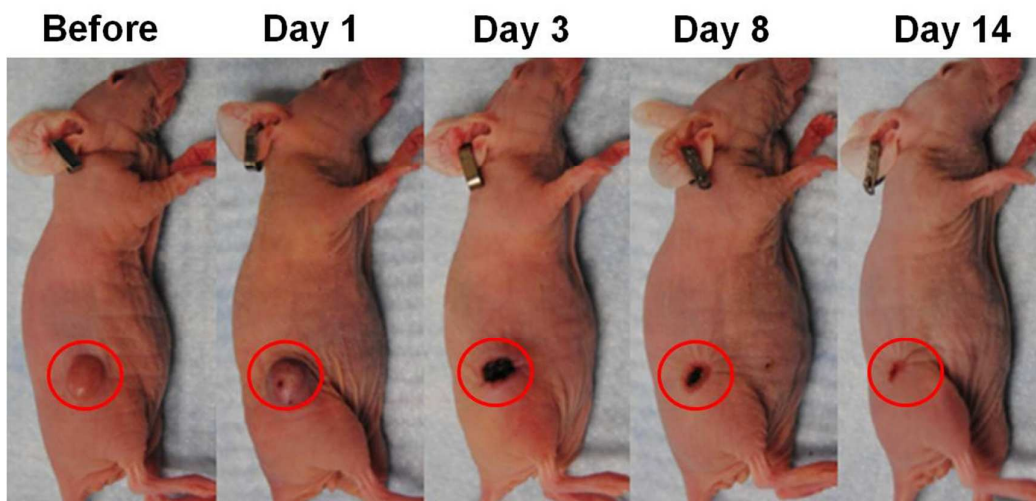

**Figure S11.** Typical time dependent variation photographs of 4T1 tumor-bearing mice with GBFs (400  $\mu\text{g}/\text{mL}$ , 50  $\mu\text{L}$ ) injection after exposed to the 808 nm laser at power density of 0.5  $\text{W}/\text{cm}^2$  for 5 min.

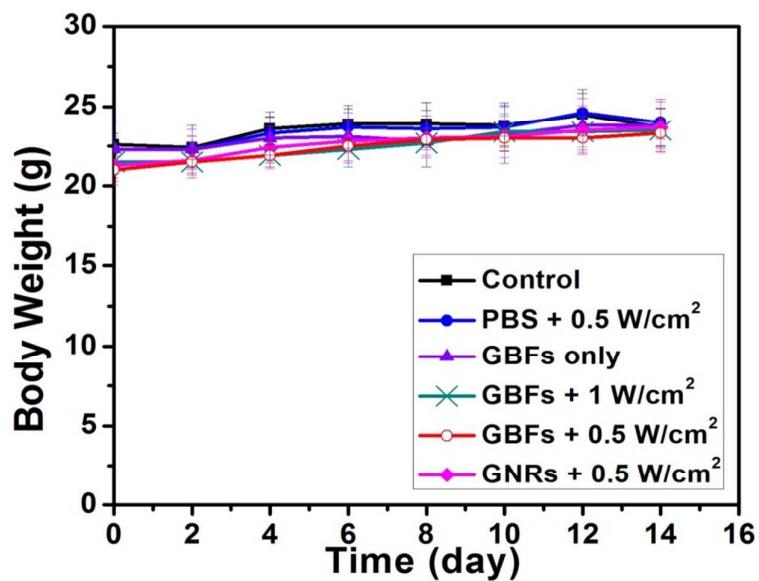

**Figure S12.** Mice body weight changes of tumor-bearing mice after various treatments indicated. The body weight of mice did not show significant change over 2 weeks, indicating the excellent biocompatibility of GBFs in vivo.

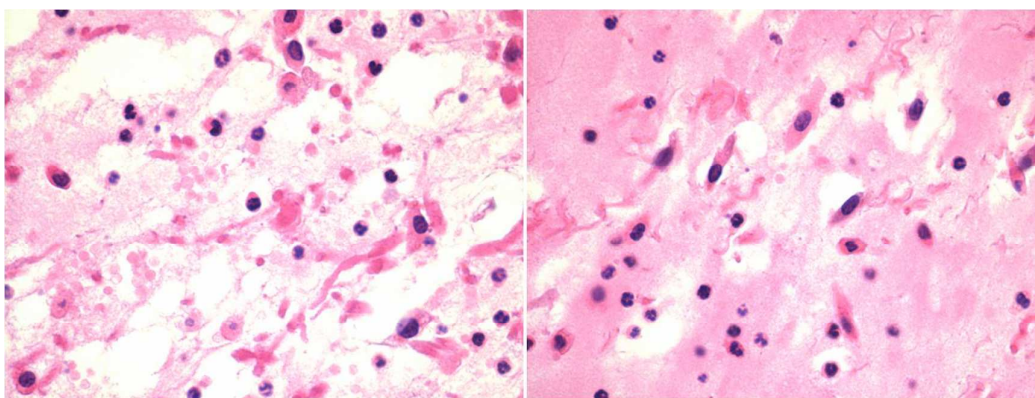

**Figure S13.** H&E stained images (40 x) of tumor section collected from GBFs/laser group of mice at day1.



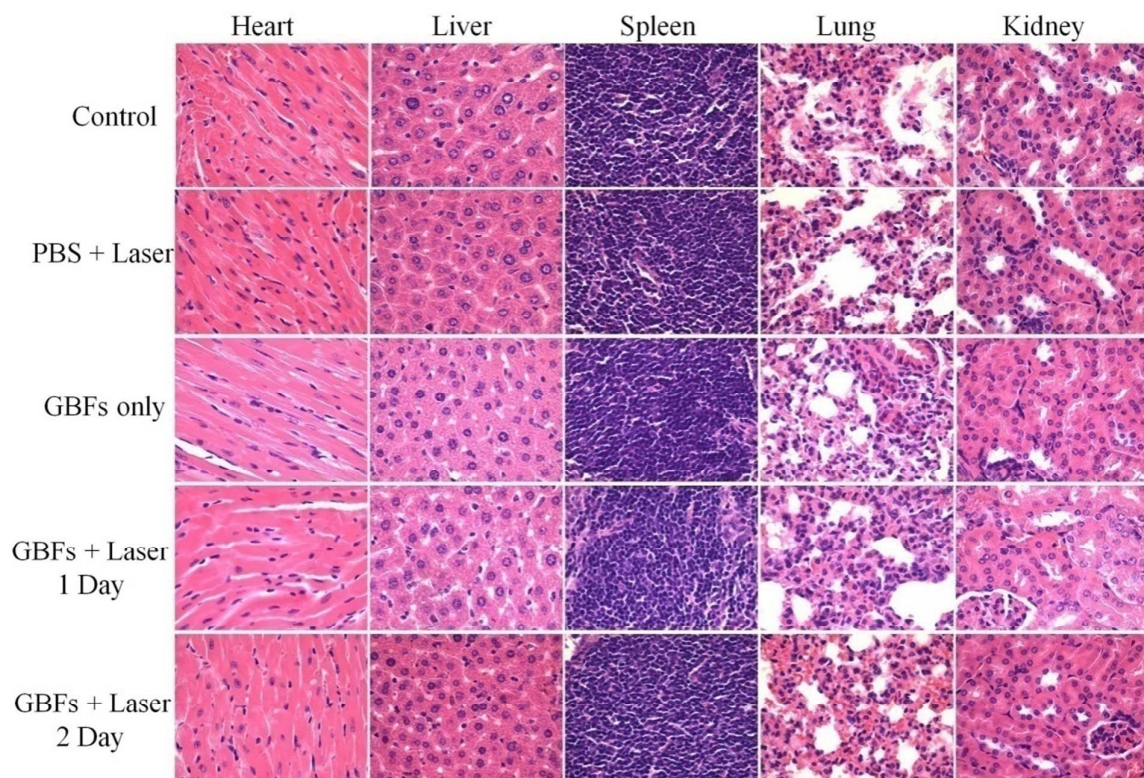

**Figure S14.** H&E stained images of major organs collected from different groups of mice.

**Table S1** Photothermal conversion efficiency of GBFs comparing with various nanomaterials.

| Photothermal conversion agents                                   | Photothermal conversion efficiency ( $\eta$ ) | Wavelength (nm) | References |
|------------------------------------------------------------------|-----------------------------------------------|-----------------|------------|
| Gold Nanoshells                                                  | 13%                                           | 800             | [51]       |
| Gold Vesicles                                                    | 18%                                           | 808             | [5, 71]    |
| Gold Nanorods                                                    | 22%                                           | 808             | [5]        |
| Gold Hexapods                                                    | 29.6%                                         | 808             | [39]       |
| Biodegradable Gold Vesicles                                      | 37%                                           | 808             | [5]        |
| Gold Nanocages                                                   | 63%                                           | 808             | [39]       |
| <b>Gold Bellflowers</b>                                          | <b>74%</b>                                    | <b>808</b>      | This study |
| Cu <sub>2-x</sub> Se Nanocrystals                                | 22%                                           | 800             | [51]       |
| Cu <sub>9</sub> S <sub>5</sub> Nanocrystals                      | 25.7%                                         | 980             | [48]       |
| Fe <sub>3</sub> O <sub>4</sub> @Cu <sub>2-x</sub> S Nanocrystals | 16%                                           | 980             | [49]       |
| Dopamine-melanin Nanospheres                                     | 40%                                           | 808             | [50]       |
